# Supplementary material
Source: HighWire-hosted journal article supplement (https://bmjopen.bmj.com/content/14/3/e082375)
Supplement: inline-supplementary-material-2 [file inline-supplementary-material-2.pdf]

**Appendix II: Data Extraction Tool**

| <b>Portable Devices for Diagnosis of Glaucoma: A Scoping Review</b>      |            |                  |
|--------------------------------------------------------------------------|------------|------------------|
| Data Collection Tool                                                     |            |                  |
| Reviewers Details and Date:                                              |            |                  |
| Article No.                                                              |            |                  |
| Parameters                                                               | Extraction | Comment (if any) |
| Author(s)                                                                |            |                  |
| Year of publication                                                      |            |                  |
| Aim/purpose                                                              |            |                  |
| Continent & Country                                                      |            |                  |
| Study population                                                         |            |                  |
| Sample size                                                              |            |                  |
| Methodology                                                              |            |                  |
| Type of Glaucoma                                                         |            |                  |
| Portable devices used and comparator                                     |            |                  |
| Reliability and sensitivity of portable devices in diagnosis of glaucoma |            |                  |
| Reliability and sensitivity of portable devices in diagnosis of glaucoma |            |                  |
| Duration of the intervention                                             |            |                  |
| How outcomes are measured                                                |            |                  |
